# Supplementary material for: Low-dimensional learned feature spaces quantify individual and group differences in vocal repertoires
Source: eLife journal article supplement (doi:10.7554/elife.67855), 2021-05-14

Traditional Feature  
Pairwise Absolute  
Correlations

Corresponding Latent  
Feature Pairwise  
Absolute Correlations

MUPET

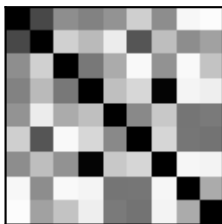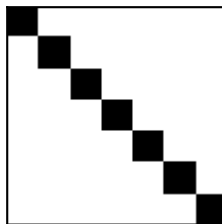

DeepSqueak

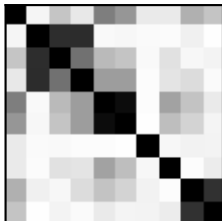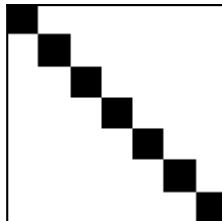

SAP

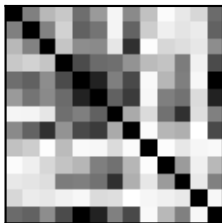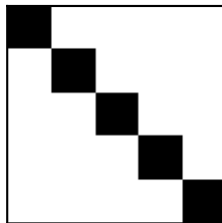

Supplement: supp [file elife_poa_e67855_Figure_2_figure_supplement_1.pdf › elife_poa_e67855_Figure_2_figure_supplement_1.pdf]
