# Supplementary material for: Low-dimensional learned feature spaces quantify individual and group differences in vocal repertoires
Source: eLife journal article supplement (doi:10.7554/elife.67855), 2021-05-14

Query

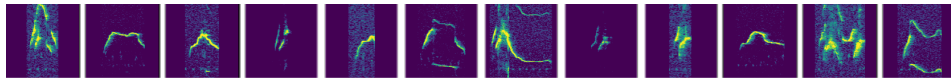

**Nearest Neighbors  
Features**

---

Latent

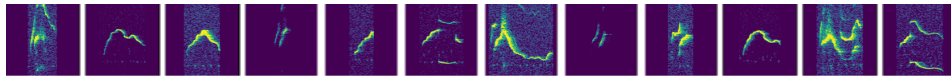

DeepSqueak

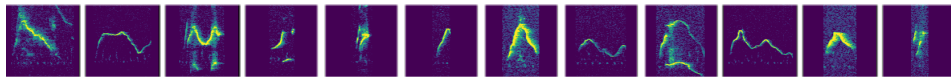

DeepSqueak  
Predicts Latent

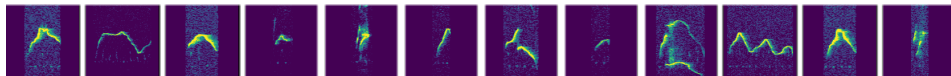

Whitened  
DeepSqueak

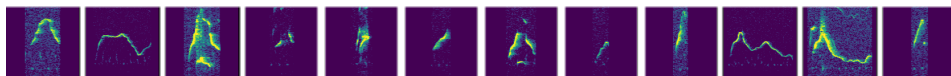

DeepSqueak  
Subset

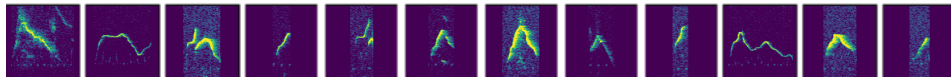

Supplement: supp [file elife_poa_e67855_Figure_3_figure_supplement_1.pdf › elife_poa_e67855_Figure_3_figure_supplement_1.pdf]
