# Supplementary figures and images for: Low-dimensional learned feature spaces quantify individual and group differences in vocal repertoires
Source: eLife journal article supplement (doi:10.7554/elife.67855), 2021-05-14

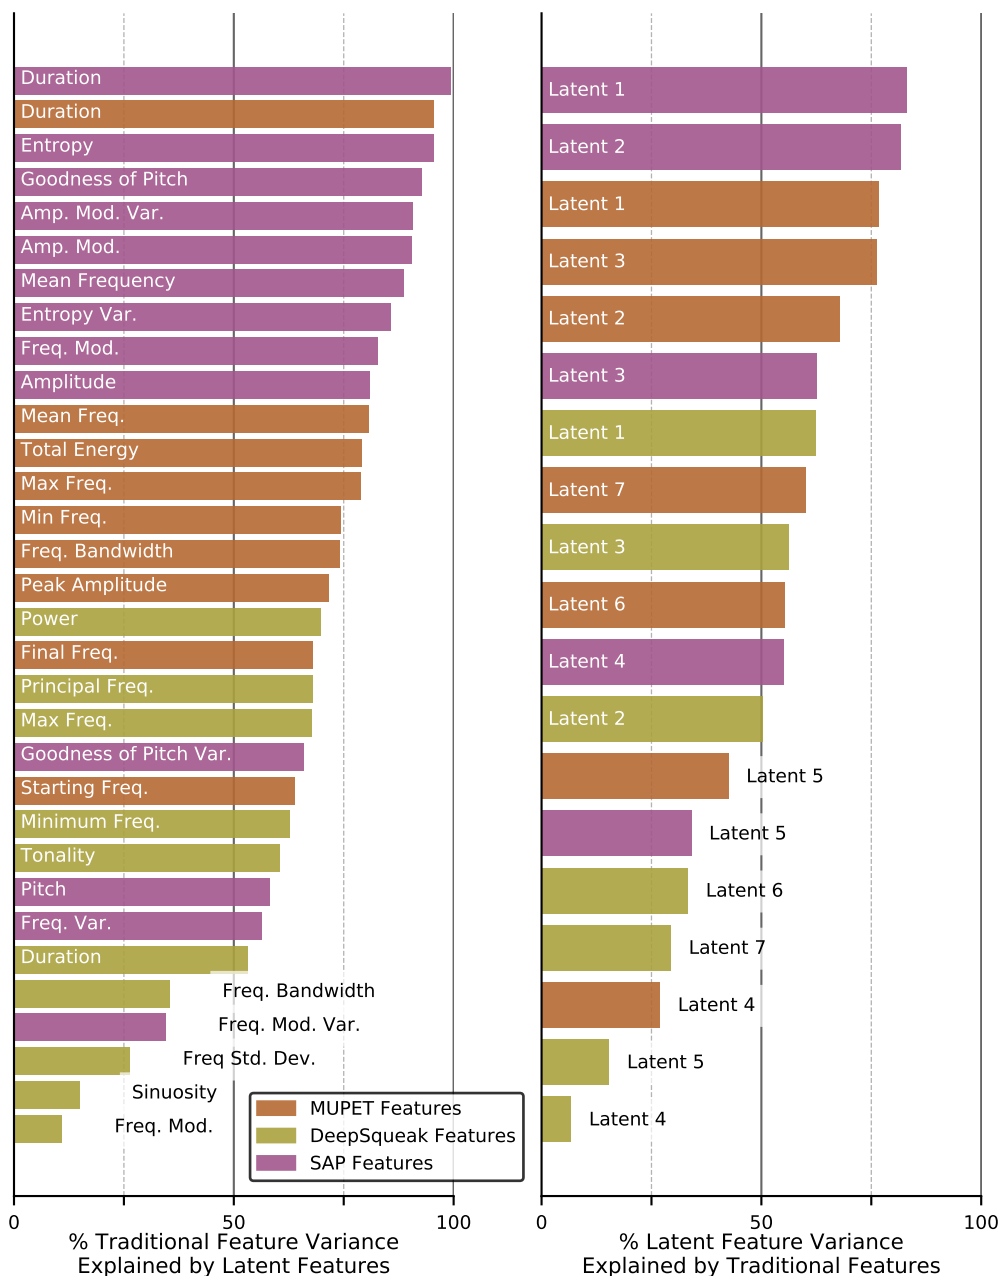

Supplement: supp [file elife_poa_e67855_Figure_1_figure_supplement_1.pdf › elife_poa_e67855_Figure_1_figure_supplement_1.pdf]

Mouse Syllables

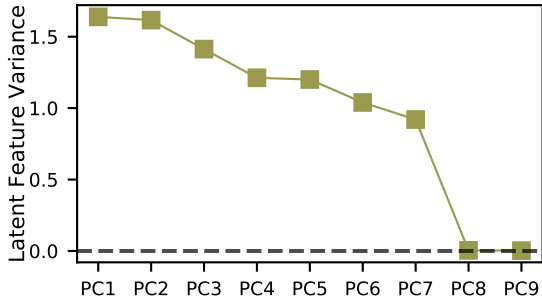

Zebra Finch Syllables

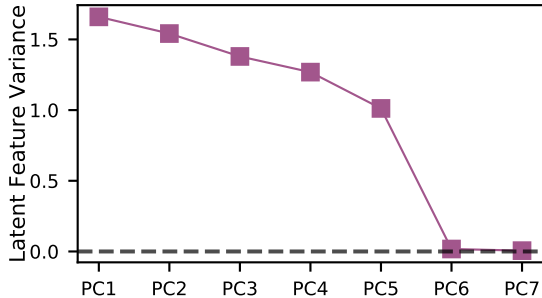

Supplement: supp [file elife_poa_e67855_Figure_2_figure_supplement_2.pdf › elife_poa_e67855_Figure_2_figure_supplement_2.pdf]

## Predicting Traditional Features

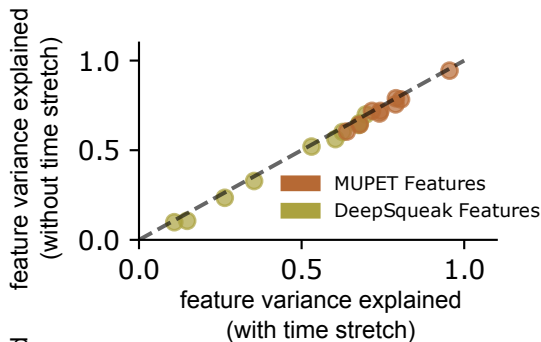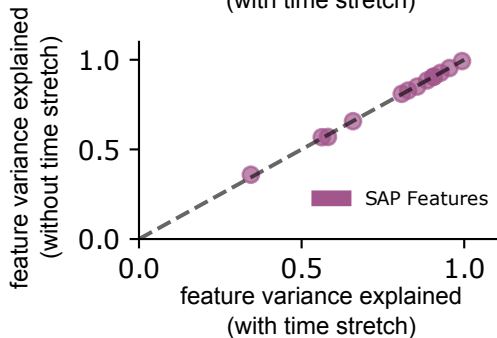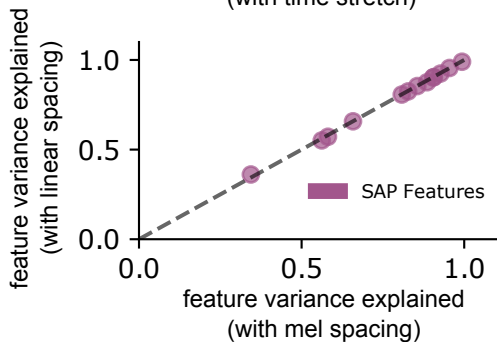

## Comparing Pairwise Distances

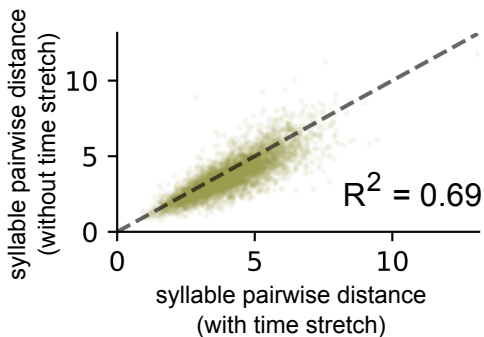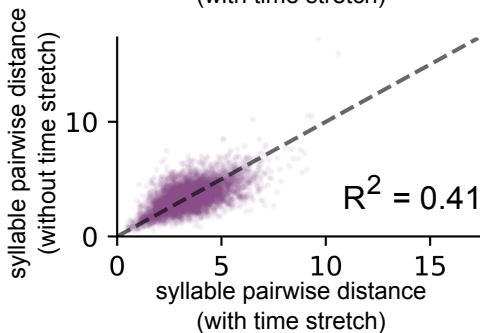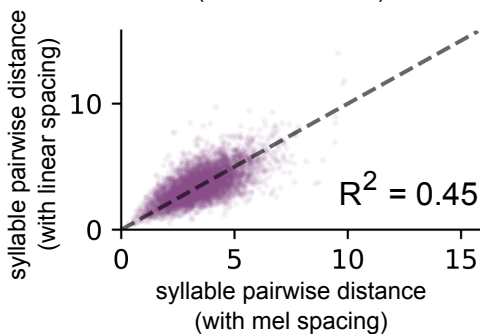

Supplement: supp [file elife_poa_e67855_Figure_2_figure_supplement_3.pdf › elife_poa_e67855_Figure_2_figure_supplement_3.pdf]

## Identical Data

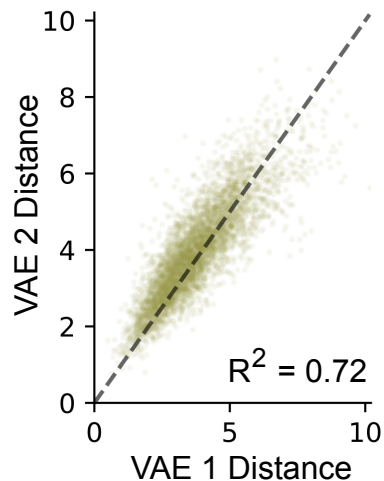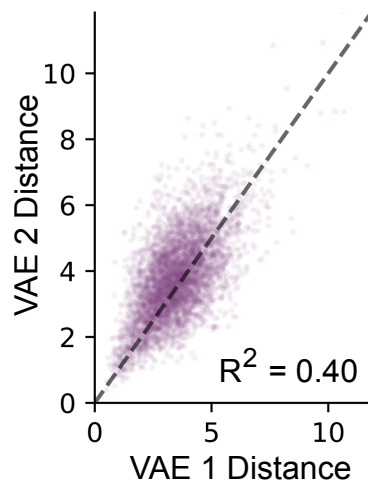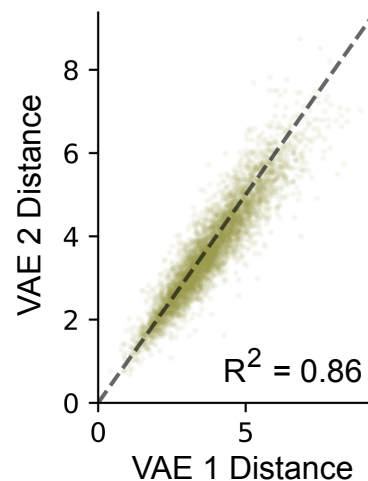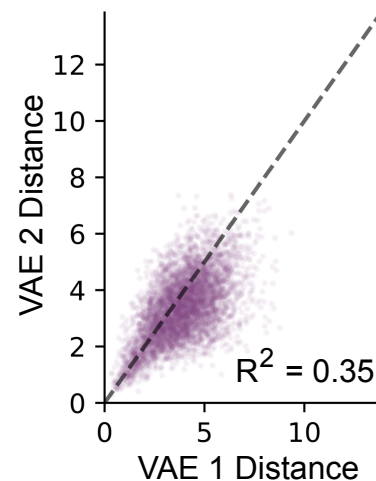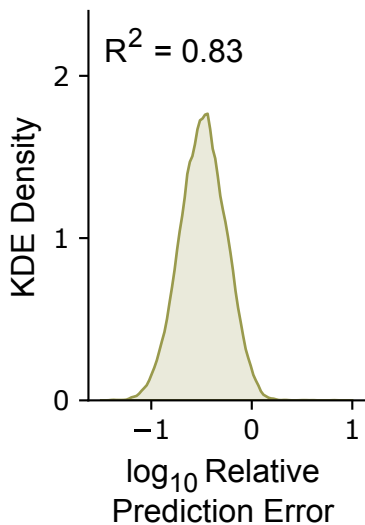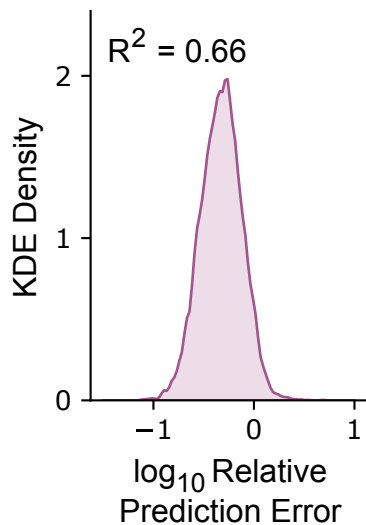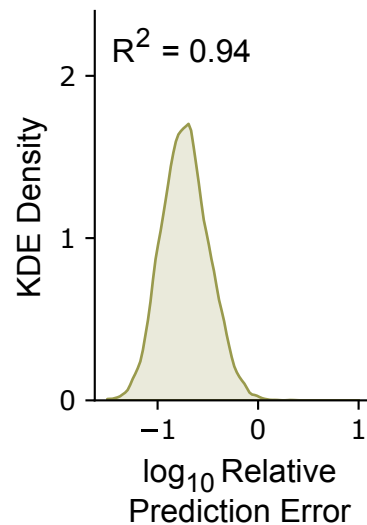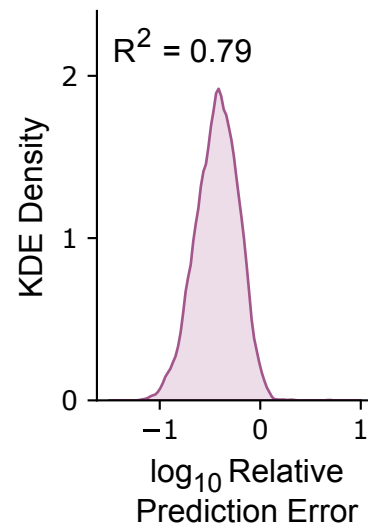

## Identically Distributed Data



Supplement: supp [file elife_poa_e67855_Figure_2_figure_supplement_4.pdf › elife_poa_e67855_Figure_2_figure_supplement_4.pdf]

Query:

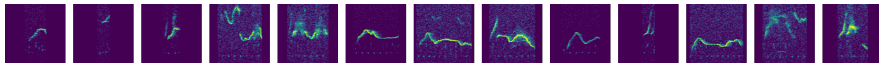

Latent NN:

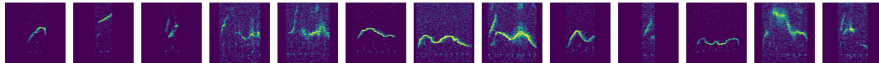

$L_1$  NN:

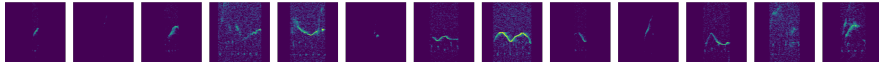

Query:

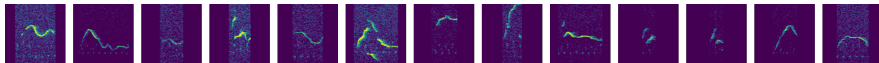

Latent NN:

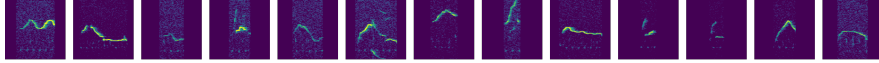

$L_2$  NN:

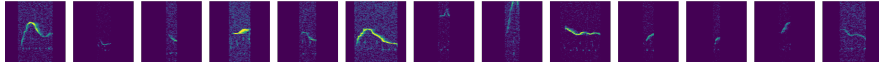

Query:

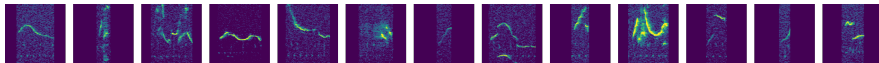

Latent NN:

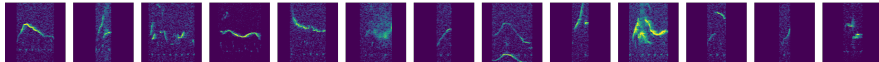

Cosine NN:

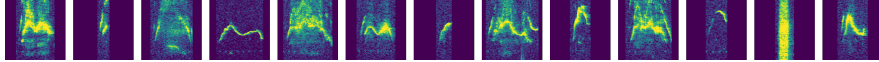

Supplement: supp [file elife_poa_e67855_Figure_2_figure_supplement_5.pdf › elife_poa_e67855_Figure_2_figure_supplement_5.pdf]

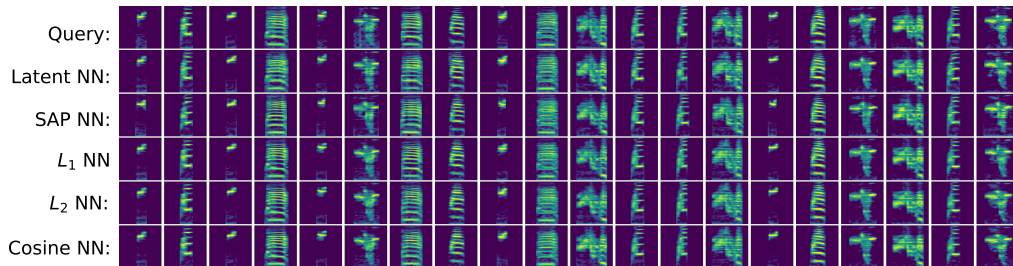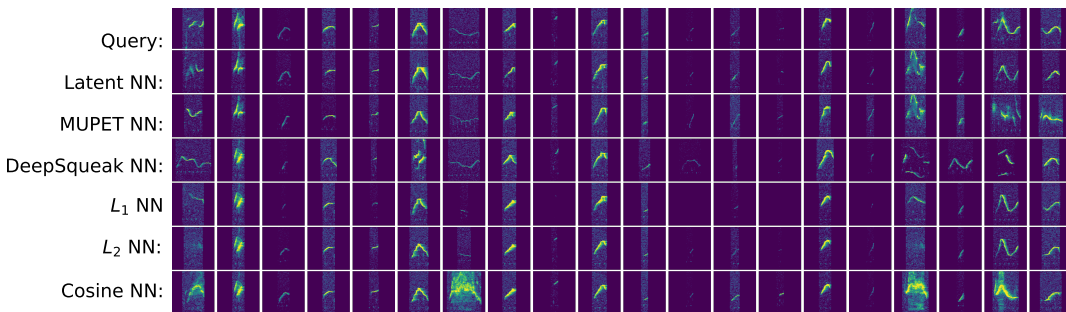

Supplement: supp [file elife_poa_e67855_Figure_2_figure_supplement_6.pdf › elife_poa_e67855_Figure_2_figure_supplement_6.pdf]

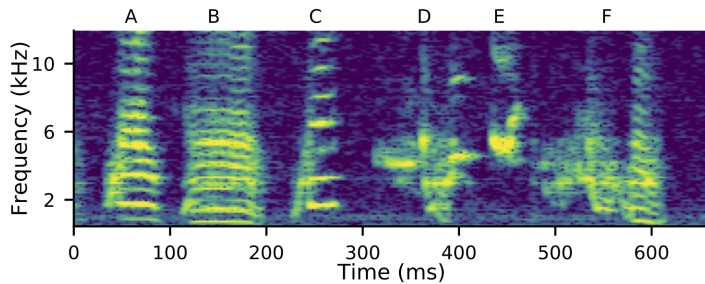

SAP Feature  
Principal  
Components

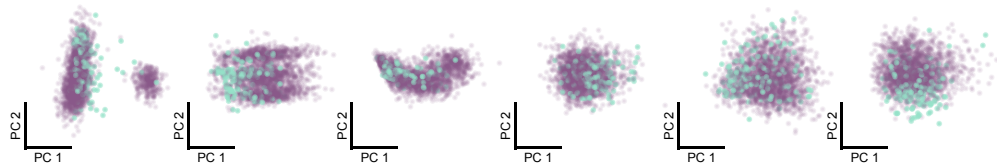

Latent Feature  
Principal  
Components

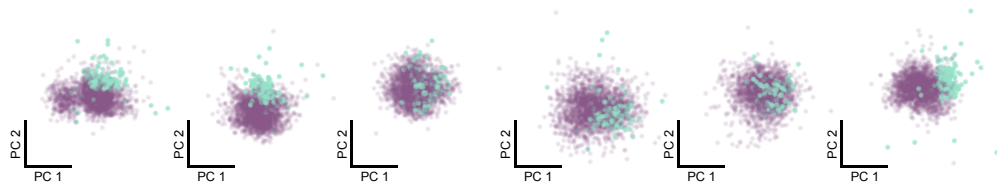

A

B

C

D

E

F

Supplement: supp [file elife_poa_e67855_Figure_3_figure_supplement_2.pdf › elife_poa_e67855_Figure_3_figure_supplement_2.pdf]

**a**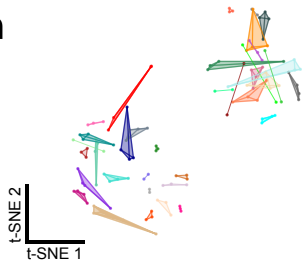**b**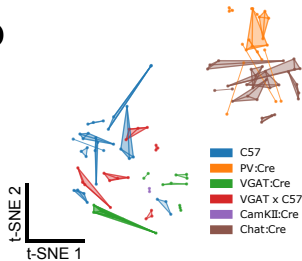**c**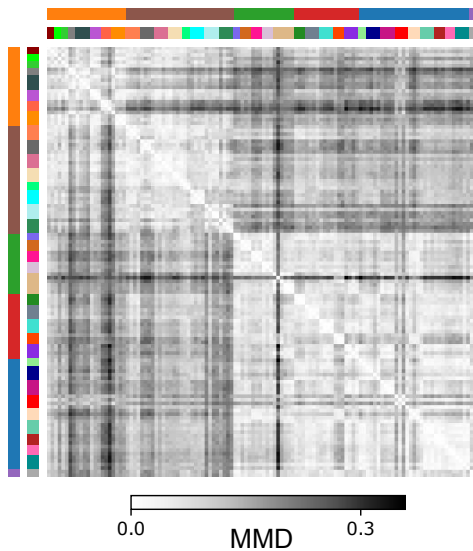

Supplement: supp [file elife_poa_e67855_Figure_4_figure_supplement_1.pdf › elife_poa_e67855_Figure_4_figure_supplement_1.pdf]

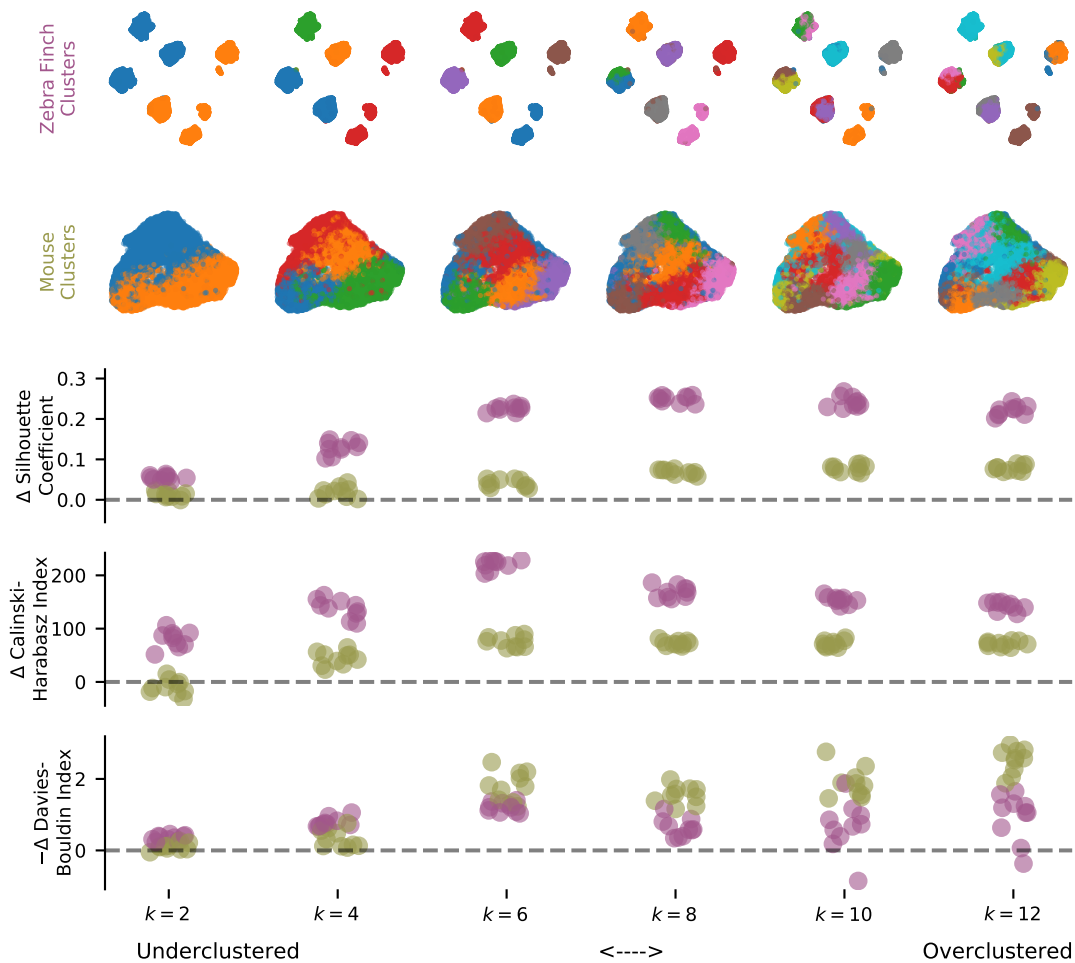

Supplement: supp [file elife_poa_e67855_Figure_4_figure_supplement_2.pdf › elife_poa_e67855_Figure_4_figure_supplement_2.pdf]

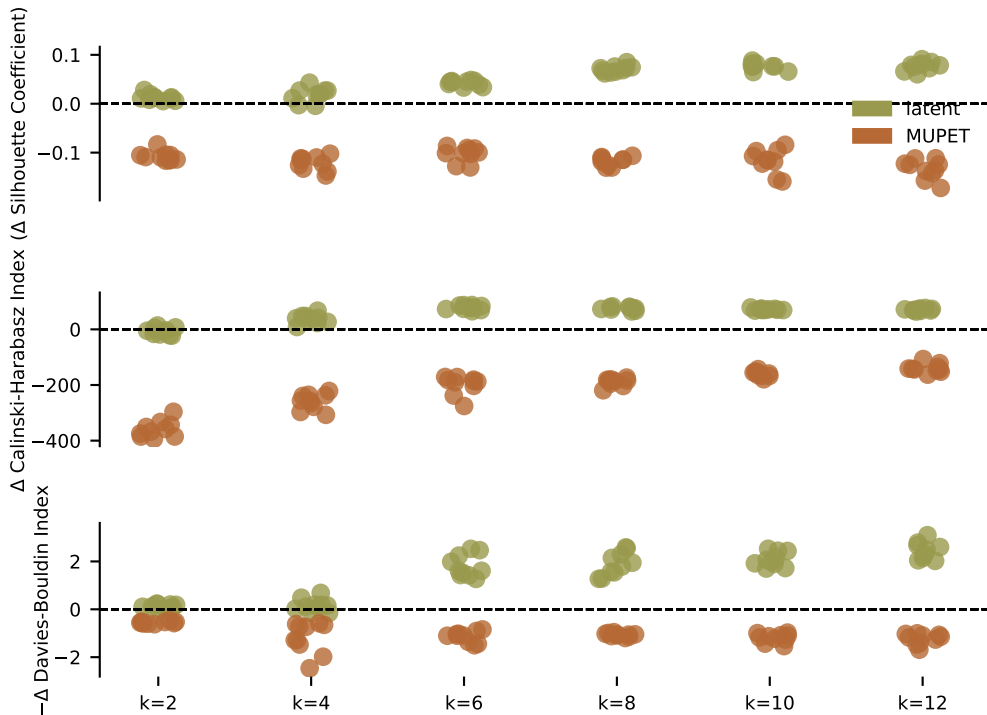

Supplement: supp [file elife_poa_e67855_Figure_4_figure_supplement_3.pdf › elife_poa_e67855_Figure_4_figure_supplement_3.pdf]

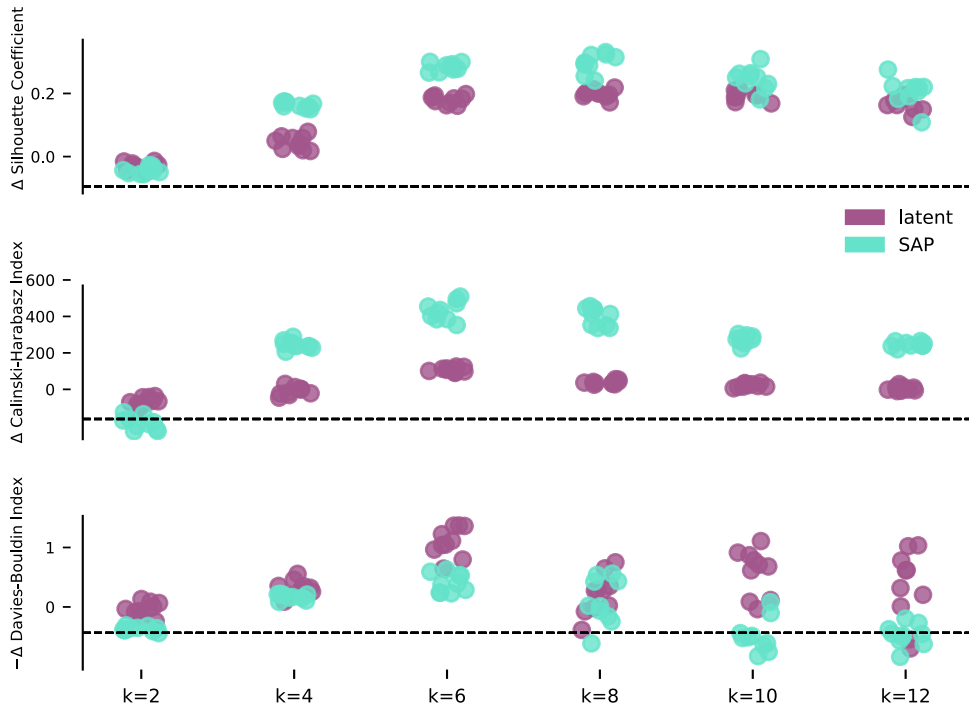

Supplement: supp [file elife_poa_e67855_Figure_5_figure_supplement_1.pdf › elife_poa_e67855_Figure_5_figure_supplement_1.pdf]

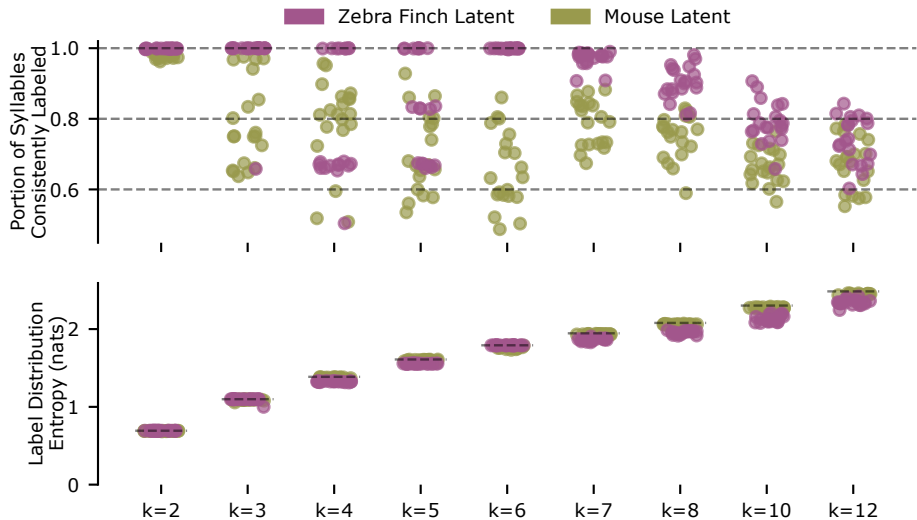

Supplement: supp [file elife_poa_e67855_Figure_5_figure_supplement_2.pdf › elife_poa_e67855_Figure_5_figure_supplement_2.pdf]

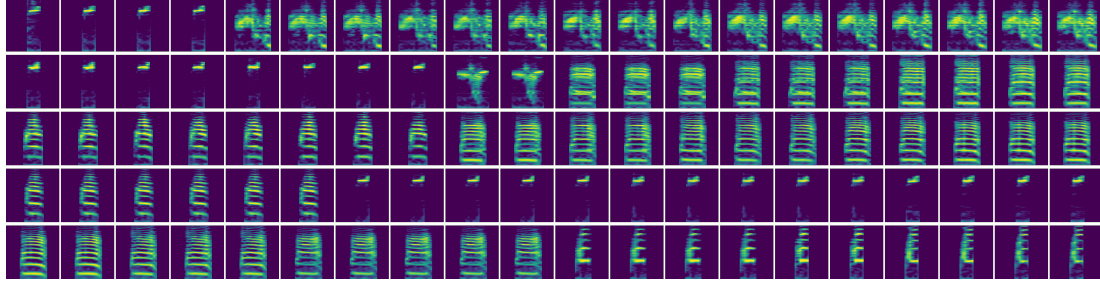

Supplement: supp [file elife_poa_e67855_Figure_5_figure_supplement_3.pdf › elife_poa_e67855_Figure_5_figure_supplement_3.pdf]

**a**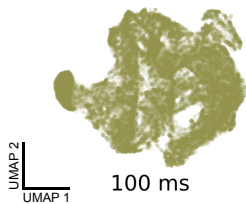**b**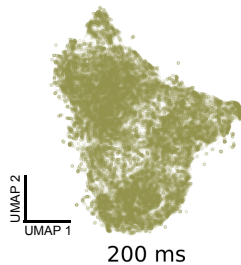**c**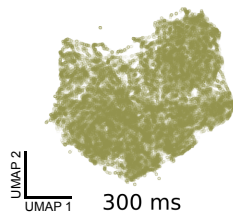**d**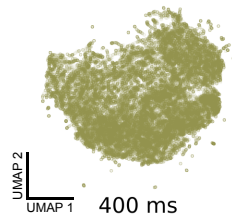**e**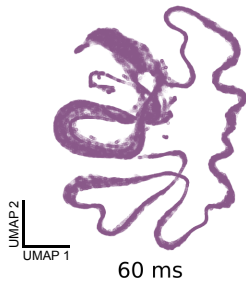**f**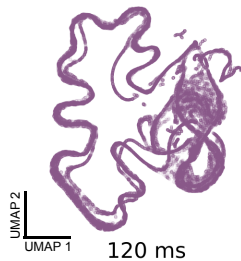**g**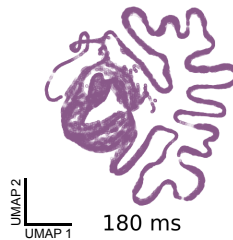**h**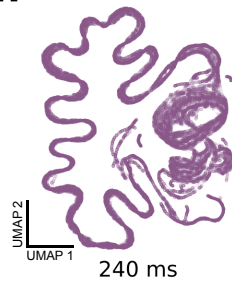

Supplement: supp [file elife_poa_e67855_Figure_5_figure_supplement_4.pdf › elife_poa_e67855_Figure_5_figure_supplement_4.pdf]

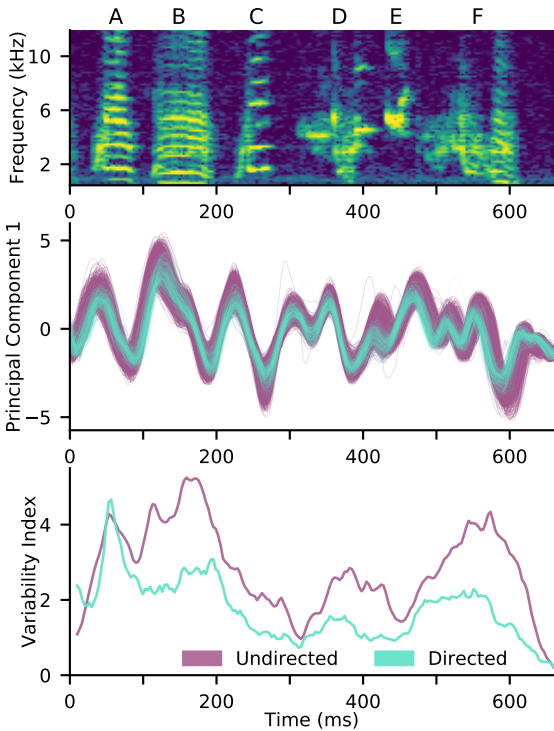

Supplement: supp [file elife_poa_e67855_Figure_5_figure_supplement_5.pdf › elife_poa_e67855_Figure_5_figure_supplement_5.pdf]

**a**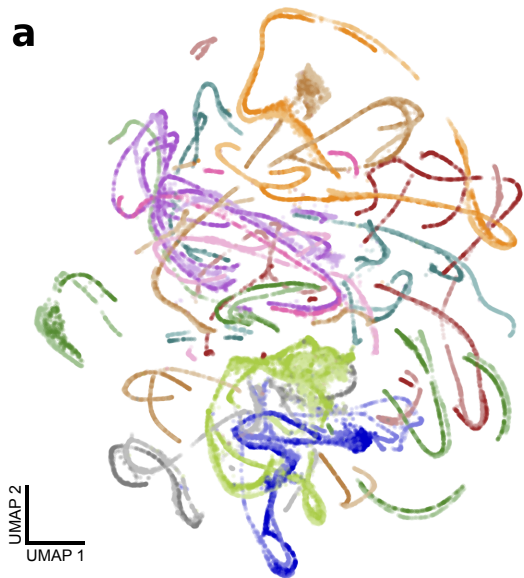**b**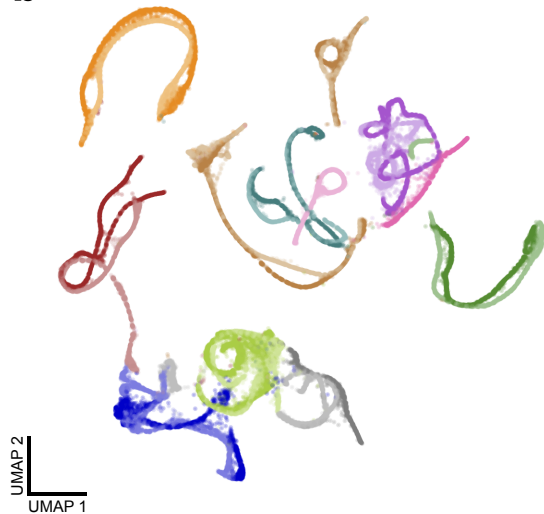

Supplement: supp [file elife_poa_e67855_Figure_6_figure_supplement_1.pdf › elife_poa_e67855_Figure_6_figure_supplement_1.pdf]

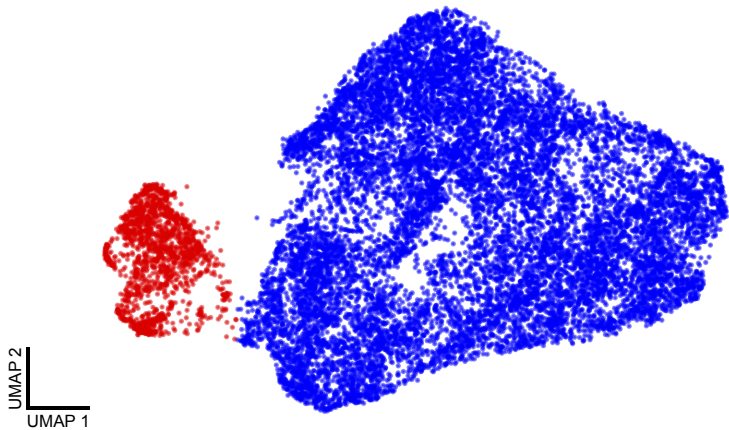

Supplement: supp [file elife_poa_e67855_Figure_6_figure_supplement_2.pdf › elife_poa_e67855_Figure_6_figure_supplement_2.pdf]

**a**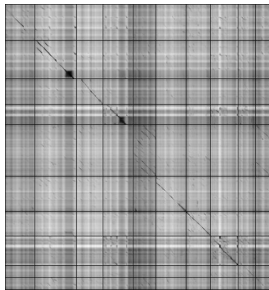**=****b**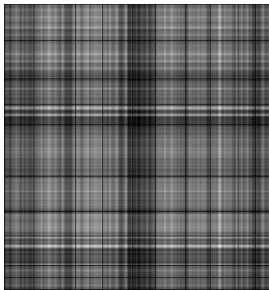**+****c**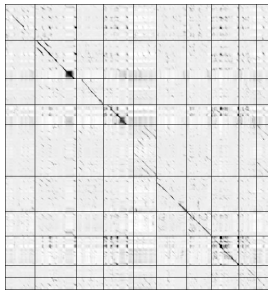

Supplement: supp [file elife_poa_e67855_Figure_7_figure_supplement_1.pdf › elife_poa_e67855_Figure_7_figure_supplement_1.pdf]

## Encoder

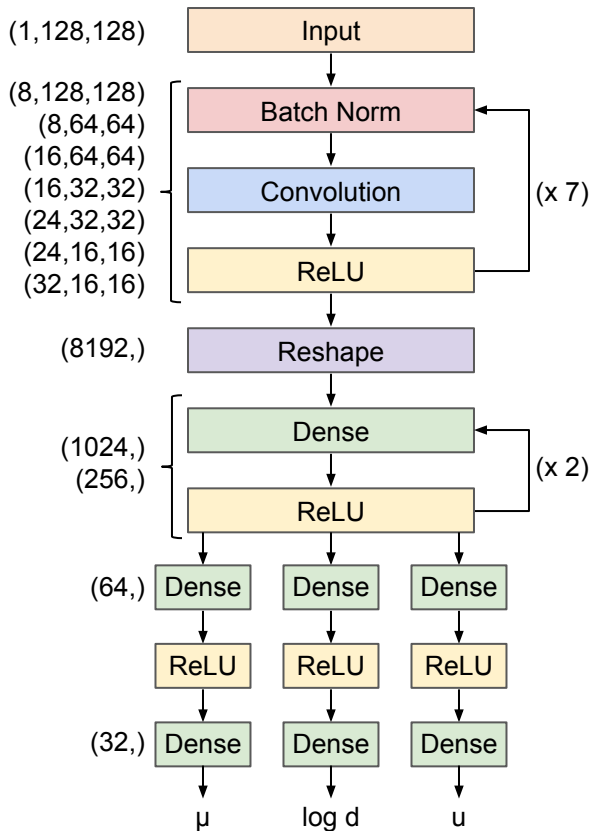

## Decoder

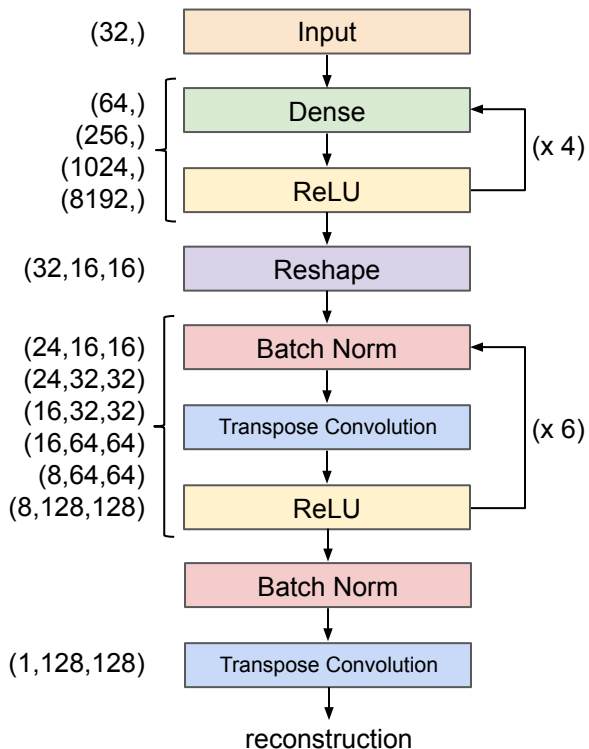

Supplement: supp [file elife_poa_e67855_Figure_7_figure_supplement_2.pdf › elife_poa_e67855_Figure_7_figure_supplement_2.pdf]
